# Supplementary material for: Enantioselective preparation and chemoselective cross-coupling of 1,1-diboron compounds
Source: Springer Nature journal article supplement (doi:10.1038/nchem.1150), 2011-09-23
Supplement: 41557_2011_BFnchem1150_MOESM9_ESM.mol [file 41557_2011_BFnchem1150_MOESM9_ESM.mol]

  ChemDraw09081106272D

 35 39  0  0  0  0  0  0  0  0999 V2000
   -1.2851   -0.4072    0.0000 O   0  0  0  0  0  0  0  0  0  0  0  0
   -0.6421   -0.0359    0.0000 C   0  0  0  0  0  0  0  0  0  0  0  0
   -0.0013   -0.4059    0.0000 C   0  0  0  0  0  0  0  0  0  0  0  0
   -0.6421    0.7040    0.0000 O   0  0  0  0  0  0  0  0  0  0  0  0
    0.6395   -0.0359    0.0000 C   0  0  0  0  0  0  0  0  0  0  0  0
    1.2803   -0.4059    0.0000 B   0  0  0  0  0  0  0  0  0  0  0  0
   -1.9972    0.0040    0.0000 C   0  0  0  0  0  0  0  0  0  0  0  0
   -2.7092   -0.4072    0.0000 C   0  0  0  0  0  0  0  0  0  0  0  0
   -3.4237    0.0053    0.0000 C   0  0  0  0  0  0  0  0  0  0  0  0
   -4.1382   -0.4072    0.0000 C   0  0  0  0  0  0  0  0  0  0  0  0
   -4.1382   -1.2322    0.0000 C   0  0  0  0  0  0  0  0  0  0  0  0
   -3.4237   -1.6447    0.0000 C   0  0  0  0  0  0  0  0  0  0  0  0
   -2.7092   -1.2322    0.0000 C   0  0  0  0  0  0  0  0  0  0  0  0
   -1.9972   -1.6433    0.0000 Br  0  0  0  0  0  0  0  0  0  0  0  0
    1.2803   -1.2309    0.0000 N   0  0  0  0  0  0  0  0  0  0  0  0
    1.9948   -1.6434    0.0000 C   0  0  0  0  0  0  0  0  0  0  0  0
    2.7092   -1.2309    0.0000 C   0  0  0  0  0  0  0  0  0  0  0  0
    2.7092   -0.4059    0.0000 C   0  0  0  0  0  0  0  0  0  0  0  0
    1.9948    0.0066    0.0000 N   0  0  0  0  0  0  0  0  0  0  0  0
    1.9948   -2.4684    0.0000 C   0  0  0  0  0  0  0  0  0  0  0  0
    2.7092   -2.8809    0.0000 C   0  0  0  0  0  0  0  0  0  0  0  0
    3.4237   -2.4684    0.0000 C   0  0  0  0  0  0  0  0  0  0  0  0
    3.4237   -1.6434    0.0000 C   0  0  0  0  0  0  0  0  0  0  0  0
    4.1382   -1.2309    0.0000 C   0  0  0  0  0  0  0  0  0  0  0  0
    4.1382   -0.4059    0.0000 C   0  0  0  0  0  0  0  0  0  0  0  0
    3.4237    0.0066    0.0000 C   0  0  0  0  0  0  0  0  0  0  0  0
    0.6395    0.7863    0.0000 B   0  0  0  0  0  0  0  0  0  0  0  0
    1.3069    1.2712    0.0000 O   0  0  0  0  0  0  0  0  0  0  0  0
    1.0520    2.0559    0.0000 C   0  0  0  0  0  0  0  0  0  0  0  0
    0.2270    2.0559    0.0000 C   0  0  0  0  0  0  0  0  0  0  0  0
   -0.0279    1.2712    0.0000 O   0  0  0  0  0  0  0  0  0  0  0  0
    0.2270    2.8809    0.0000 C   0  0  0  0  0  0  0  0  0  0  0  0
   -0.3564    2.6392    0.0000 C   0  0  0  0  0  0  0  0  0  0  0  0
    1.0520    2.8809    0.0000 C   0  0  0  0  0  0  0  0  0  0  0  0
    1.6354    2.6392    0.0000 C   0  0  0  0  0  0  0  0  0  0  0  0
  1  2  1  0      
  2  3  1  0      
  2  4  2  0      
  3  5  1  0      
  5  6  1  0      
  1  7  1  0      
  7  8  1  0      
  8  9  2  0      
  9 10  1  0      
 10 11  2  0      
 11 12  1  0      
 12 13  2  0      
 13  8  1  0      
 13 14  1  0      
  6 15  1  0      
 15 16  1  0      
 16 17  2  0      
 17 18  1  0      
 18 19  1  0      
 19  6  1  0      
 16 20  1  0      
 20 21  2  0      
 21 22  1  0      
 22 23  2  0      
 23 17  1  0      
 23 24  1  0      
 24 25  2  0      
 25 26  1  0      
 26 18  2  0      
  5 27  1  1      
 27 28  1  0      
 28 29  1  0      
 29 30  1  0      
 30 31  1  0      
 31 27  1  0      
 30 32  1  0      
 30 33  1  0      
 29 34  1  0      
 29 35  1  0      
M  END
